# Supplementary material for: SteadyCom: Predicting microbial abundances while ensuring community stability
Source: PLoS Comput Biol. 2017 May 15;13(5):e1005539. doi: 10.1371/journal.pcbi.1005539 (PMC5448816; doi:10.1371/journal.pcbi.1005539)
Supplement: S4 Table — (XLSX) [file pcbi.1005539.s015.xlsx]

## Sheet: readme
S5 Diet Estimation
This excel file contains the estimation for the average American diet based on the food consumption data from USDA [1] and the chemical composition of food from USDA [2]
Sheet	Description
uptake	Calculation of the final estimated nutrient uptake rates. ""Estimated average american diet" in column X is the final estimation in the unit of mmol/hr
consumption	Food consuption data from USDA [1] with breakdown into the macronutrients present in the food
**The sheets below contain chemical composition of food from USDA [2]. Each item represents a major category of consumed food in US [1]. The categories are meat, eggs, vegetables, fruits, dairy products, added fats and oils, grain products, and sweeteners
meat	chemical composition of meat, averaged from beef, pork and chicken
egg	chemical composition of egg
potato	chemical composition of potato, representing vegetable (from [1,3], potato is the most consumed vegetable per capita)
banana	chemical composition of banana, representing fruits (from [3], banana is the most consumed fruit per capita)
milk	chemical composition of milk, representing dairy products
oil	chemical composition of canola oil, representing added fats and oils (from [1], cooking oil is the most consumed item per capita in added fats and oils)
flour	chemical composition of whole-grain wheat flour, representing grain products (from [1], wheat flour is the most consumed grain product per capita)
corn_syrup	chemical composition of corn syrup, representing sweeteners (from [1], corn sweeterner is the most consumed sweetener per capita)
References
1. United States Deparment of Agriculture. Agriculture Fact Book 2001-2002 [Internet]. 2003 [cited 2016 Apr 13]. p. 174. Available from: http://www.usda.gov/documents/usda-factbook-2001-2002.pdf
2. USDA National Nutrient Database for Standard Reference [Internet]. [cited 2016 Apr 13]. Available from: https://ndb.nal.usda.gov/
3. Produce For Better Health Foundation. 2015 State of the Plate [Internet]. 2015. Available from: http://www.pbhfoundation.org/pdfs/about/res/pbh_res/State_of_the_Plate_2015_WEB_Bookmarked.pdf

## Sheet: uptake
community metabolites						mg/hr assuming consumption of 1 kg of that food per day								mg/hr normalized by consumption									mmol/hr uptake rate				Cross-checking
mets	metNames	metFormulas	MW (g/mol)	Category	Category 2	meat	egg	potato	banana	milk	canola oil	wheat flour	corn syrup	meat	egg	potato	banana	milk	canola oil	wheat flour	corn syrup	Sum	Estimated average american diet	normalized to 100% weight of each category	Remark		total mg/hr in estimated average american diet	meat	egg	potato	banana	milk	canola oil	wheat flour	corn syrup	Total
ala-L[u]	l-alanine	C3H7NO2	89	AA	AA	575.409	306.25	38.75	16.6667	51.25		203.75		139.779	9.22313	20.6541	5.79512	37.8212	0	50.6871	0	263.96	2.96584	19.2895			AA	2310.83	161.399	668.261	123.581	1153.09	0	1458.73	0	5875.89
arg-L[u]	l-arginine	C6H15N4O2	175	AA	AA	636.229	341.667	57.9167	20.4167	53.75		270		154.554	10.2898	30.8701	7.09902	39.6662	0	67.1682	0	309.647	1.76941	11.5081			Carbo	29.9279	6.83892	7086.81	2932.33	1688.12	0	6350.92	6068.28	24163.2			0.382161
asp-L[u]	l-aspartate	C4H6NO4	132	AA	AA	882.982	553.75	306.25	51.6667	112.917		300.833		214.496	16.6769	163.234	17.9649	83.3297	0	74.8386	0	570.54	4.32227	28.1115			Fiber	3.76452	0	710.68	376.683	0	0	1109.1	0	2200.23
asn-L[u]	l-asparagine	C4H8N2O3	132	AA	AA	0	0	0	0	0		0		0	0	0	0	0	0	0	0	0	0	0			Fat	1366.06	84.0372	1595.03	20.8624	197.716	2640.14	72.8692	0	5976.72			0.0729927	1.43717
cys-L[u]	l-2-amino-3-mercaptopropionic acid|l-cysteine	C3H7NO2S	121.07	AA	AA	131.987	113.333	16.25	3.75	13.75		114.583		32.0625	3.41319	8.66141	1.3039	10.1472	0	28.505	0	84.0931	0.694583	4.51748			weight % (not exactly the same as the % of category because some nutrients in the original data were not accounted in the model)												0.0507891
gln-L[u]	l-2-aminoglutaramic acid|l-glutamine	C5H10N2O3	146	AA	AA	0	0	0	0	0		0		0	0	0	0	0	0	0	0	0	0	0			AA	0.228303	0.12862	0.03009	0.00853	0.0375	0	0.14073	0	0.0582042
glu-L[u]	dl-glutaminic acid|dl-glutamate|2-aminoglutaric acid|glutaminic acid|glutamate|glu|l-glutaminic acid|l-glutamic acid|l-glutamate	C5H8NO4	146	AA	AA	1484.19	697.083	210	63.3333	311.667		1803.33		360.542	20.9936	111.932	22.0214	230.002	0	448.617	0	1194.11	8.17882	53.1941			Carbo	0.0029568	0.00545	0.3191	0.2024	0.0549	0	0.6127	0.7679	0.239351
gly[u]	glycine	C2H5NO2	75	AA	AA	554.279	180	37.0833	15.8333	31.6667		237.083		134.647	5.42094	19.7658	5.50536	23.3692	0	58.9795	0	247.687	3.3025	21.479			Fiber	0.000371924	0	0.032	0.026	0	0	0.107	0	0.0217946
his-L[u]	l-histidine	C6H9N3O2	155	AA	AA	327.492	128.75	27.9167	32.0833	40.4167		148.75		79.5551	3.87748	14.8799	11.1556	29.8265	0	37.0047	0	176.299	1.13741	7.3976			Fat	0.134963	0.06697	0.07182	0.00144	0.00643	0.68343	0.00703	0	0.0592029
ile-L[u]	l-isoleucine	C6H13NO2	131	AA	AA	471.447	279.583	51.25	11.6667	90		184.583		114.525	8.42003	27.3168	4.05658	66.4178	0	45.919	0	266.655	2.03554	13.2389			dry weight % (sum of AA, carbo, fiber and fat only, for changing the fraction of nutrients in the model)
leu-L[u]	(2s)-alpha-leucine|(2s)-alpha-2-amino-4-methylvaleric acid|2-amino-4-methylvaleric acid|l-leucine	C6H13NO2	131	AA	AA	765.092	452.5	75.4167	28.3333	145.833		374.167		185.858	13.6277	40.1978	9.8517	107.621	0	93.0818	0	450.238	3.43693	22.3534			AA	0.622767	0.639773	0.0664224	0.0357847	0.379439	0	0.162232	0	0.153754
lys-L[u]	l-lysine	C6H15N2O2	147	AA	AA	831.835	380	75.8333	20.8333	117.917		149.583		202.071	11.4442	40.4199	7.2439	87.0196	0	37.212	0	385.411	2.62184	17.0521			Carbo	0.00806556	0.027109	0.704399	0.8491	0.555499	0	0.706315	1	0.632279
met-L[u]	2-amino-4-(methylthio)butyric acid|l-2-amino-4methylthiobutyric acid|methionine|l-methionine	C5H11NO2S	149.07	AA	AA	270.511	158.333	19.5833	3.33333	37.5		95		65.713	4.76842	10.4381	1.15902	27.6741	0	23.6333	0	133.386	0.894787	5.81959			Fiber	0.00101454	0	0.0706386	0.109074	0	0	0.123349	0	0.0575735
phe-L[u]	l-phenylalanine	C9H11NO2	165	AA	AA	399.481	283.333	55.4167	20.4167	71.6667		284.167		97.0428	8.53297	29.5376	7.09902	52.8882	0	70.6924	0	265.793	1.61087	10.4769			Fat	0.368153	0.333118	0.15854	0.00604103	0.0650612	1	0.00810412	0	0.156393
pro-L[u]	2-pyrrolidinecarboxylic acid|l-proline	C5H8NO2	114	AA	AA	451.408	213.333	45.4167	11.6667	144.167		864.583		109.657	6.42482	24.2075	4.05658	106.391	0	215.083	0	465.821	4.08615	26.5758
ser-L[u]	dl-serine|3-hydroxyalanine|2-amino-3-hydroxypropionic acid|serine|l-3-hydroxy-alanine|l-2-amino-3-hydroxypropionic acid|l-serine	C3H7NO3	105	AA	AA	367.548	404.583	55	16.6667	80.8333		258.333		89.2855	12.1846	29.3155	5.79512	59.653	0	64.2659	0	260.5	2.48095	16.1358			For estimating minerals and vitamins	mg/hr	number of metabolites
thr-L[u]	l-threonine	C4H9NO3	119	AA	AA	401.498	231.667	45.4167	11.6667	67.0833		152.917		97.5328	6.97696	24.2075	4.05658	49.5058	0	38.0412	0	220.321	1.85144	12.0415			Mineral total:	921.987	18
trp-L[u]	l-tryptophan	C11H12N2O2	204	AA	AA	117.007	69.5833	19.5833	3.75	20.8333		72.5		28.4236	2.0956	10.4381	1.3039	15.3745	0	18.0359	0	75.6715	0.370939	2.41254			Vitamin total:	69.1468	19
tyr-L[u]	l-tyrosine	C9H11NO3	181	AA	AA	316.614	207.917	46.6667	3.75	71.6667		114.583		76.9126	6.26169	24.8738	1.3039	52.8882	0	28.505	0	190.745	1.05384	6.85405
val-L[u]	2-amino-3-methylbutyric acid|l-valine	C5H11NO2	117	AA	AA	527.63	357.5	70	19.5833	99.5833		235		128.173	10.7666	37.3107	6.80926	73.49	0	58.4612	0	315.011	2.6924	17.511
sucr[u]	sucr|1-alpha-d-glucopyranosyl-2-beta-d-fructofuranoside|saccharose|cane sugar|sucrose	C12H22O11	342	carbo (disaccharide)	CB	0	0	137.5	995.833	0	0	150	7996.87	0	0	73.2888	346.258	0	0	37.3157	1516.67	1973.54	5.77058	9.12663
malt[u]	1-alpha-d-glucopyranosyl-4-alpha-d-glucopyranose|malt sugar|maltose	C12H22O11	342	carbo (disaccharide)	CB	0	0	0	4.16667	0	0	0	7996.87	0	0	0	1.44878	0	0	0	1516.67	1518.12	4.43896	7.02056
glc-D[u]	d-glucose	C6H12O6	180	carbo (monosaccharide)	CB	0	154.167	266.667	2075	0	0	0	7996.87	0	4.64294	142.136	721.492	0	0	0	1516.67	2384.95	13.2497	20.9554
fru[u]	d-fructose	C6H12O6	180	carbo (monosaccharide)	CB	0	0	216.667	2020.83	0	0	20.8333	7996.87	0	0	115.485	702.658	0	0	5.18273	1516.67	2340	13	20.5605
lcts[u]	lact|anhydrous lactose|alpha-lactose|milk sugar|1-beta-d-galactopyranosyl-4-alpha-d-glucopyranose|lactoselactose	C12H22O11	342	carbo (disaccharide)	CB	0	0	0	0	2287.5	0	0	0	0	0	0	0	1688.12	0	0	0	1688.12	4.93602	7.80671
gal[u]	d-galactose	C6H12O6	180	carbo (monosaccharide)	CB	0	0	0	0	0	0	0	0	0	0	0	0	0	0	0	0	0	0	0
amylose300[u]	amylose (n=300 repeat units, alpha-1,4-glc)	C1800H3002O1501	48618	carbo (polysaccharide) (glucan, starch)	CB	0	0	2535	667.5	0	0	5071.67	1.66667	0	0	1351.18	232.094	0	0	1261.68	0.316097	2845.27	0.0585231	0.0925589
starch1200[u]	starch	C7200H12002O6001	194418	carbo (polysaccharide) (glucan, starch)	CB	0	0	2535	667.5	0	0	5071.67	1.66667	0	0	1351.18	232.094	0	0	1261.68	0.316097	2845.27	0.0146348	0.0231461
strch1[u]	starch, structure 1 (1,6-{7[1,4-glc], 4[1,4-glc]})	C66H112O56	1800	carbo (polysaccharide) (glucan, starch)	CB	0	0	2535	667.5	0	0	5071.67	1.66667	0	0	1351.18	232.094	0	0	1261.68	0.316097	2845.27	1.58071	2.50002
strch2[u]	starch, structure 2 (1,6-{2[1,4-glc], [1,4-glc]})	C18H32O16	504	carbo (polysaccharide) (glucan, starch)	CB	0	0	2535	667.5	0	0	5071.67	1.66667	0	0	1351.18	232.094	0	0	1261.68	0.316097	2845.27	5.64539	8.92863
14glucan[u]	1,4-alpha-d-glucan	C36H62O31	828	carbo (polysaccharide) (glucan)	CB	0	0	2535	667.5	0	0	5071.67	1.66667	0	0	1351.18	232.094	0	0	1261.68	0.316097	2845.27	3.43632	5.43482
glycogen1500[u]	glycogen (n=1500 repeat units) (glc alpha 1,4/6 glc)	C9000H15002O7501	243018	carbo (polysaccharide) (glucan)	CB	123.2	72.9167	0	0	0	0	0	0	29.9279	2.19598	0	0	0	0	0	0	32.1239	0.000132187	0.000209065	Assumed to be the carbohydrates present only in meat
amannan140[u]	alpha-mannan, yeast, has a mw of about 25000 (pmid: 5461381), equals ~ 140 mannose units.	C840H1402O701	22698	fiber (insoluble)	F	15.4968	0	1333.33	1083.33	0	0	4458.33	0	3.76452	0	710.68	376.683	0	0	1109.1	0	2200.23	0.096935	1.68367	No details on the composition of the dietary fiber. Assume uniform weight for each fiber in the model
pect[u]	pectins	C2535H3509O2535	74489	fiber (soluble)	F	15.4968	0	1333.33	1083.33	0	0	4458.33	0	3.76452	0	710.68	376.683	0	0	1109.1	0	2200.23	0.0295377	0.513043	No details on the composition of the dietary fiber. Assume uniform weight for each fiber in the model
pecticgal[u]	pectic galactan (potato), gal: arab-l: rmn: galur = 78: 9: 4: 9 (www.megazyme.com). assumed to consist of 100 sugars per macromolecule (i could not find information).	C597H971O503	16183	fiber (soluble)	F	15.4968	0	1333.33	1083.33	0	0	4458.33	0	3.76452	0	710.68	376.683	0	0	1109.1	0	2200.23	0.135959	2.36149	No details on the composition of the dietary fiber. Assume uniform weight for each fiber in the model
arabinan101[u]	arabinan, polymer of 1,5-a-l-linked arabinofuranose units substituted by 1,3 or 1,2 linked branches, mw ~ 15000 da (ref: www.megazyme.com). contains arabinose: galactose: rhamnose: galacturonic acid = 97: 0.4: 0.1: 2.1. -> 97 arab-l, 1 gal, 1 rmn, 2 galur	C509H812O410	13480	fiber (soluble)	F	15.4968	0	1333.33	1083.33	0	0	4458.33	0	3.76452	0	710.68	376.683	0	0	1109.1	0	2200.23	0.163222	2.83502	No details on the composition of the dietary fiber. Assume uniform weight for each fiber in the model
arabinogal[u]	larch arabinogalactan, gal/ara 6:1, small amount of glcur, mw ~ 116000	C3862H6376O3218	104208	fiber (soluble)	F	15.4968	0	1333.33	1083.33	0	0	4458.33	0	3.76452	0	710.68	376.683	0	0	1109.1	0	2200.23	0.0211138	0.366729	No details on the composition of the dietary fiber. Assume uniform weight for each fiber in the model
homogal[u]	homogalacturonan, 100 galacturonate residues. assumed to be methylated/ acetylated in every 5th residue. citrus hg consists of 72-100 galacturonate residues and has a methylesterification degree of 22,9% (pmid: 11278866).	C660H840O660	19320	fiber (soluble)	F	15.4968	0	1333.33	1083.33	0	0	4458.33	0	3.76452	0	710.68	376.683	0	0	1109.1	0	2200.23	0.113884	1.97806	No details on the composition of the dietary fiber. Assume uniform weight for each fiber in the model
inulin[u]	chicory inulin, 30 monosaccharide units (29 fru, 1 glc) on average	C180H302O151	4878	fiber (soluble)	F	15.4968	0	1333.33	1083.33	0	0	4458.33	0	3.76452	0	710.68	376.683	0	0	1109.1	0	2200.23	0.451052	7.83437	No details on the composition of the dietary fiber. Assume uniform weight for each fiber in the model
kesto[u]	kestose (2 fru, 1 glc inulin-type fructo-oligosaccharide)	C18H32O16	504	fiber (soluble)	F	15.4968	0	1333.33	1083.33	0	0	4458.33	0	3.76452	0	710.68	376.683	0	0	1109.1	0	2200.23	4.36554	75.8255	No details on the composition of the dietary fiber. Assume uniform weight for each fiber in the model
rhamnogalurII[u]	wine rhamnogalacturonan ii, mw ~ 5-10 kda, 37% galur, 16% rmn, 3% fuc-l, 11% arab-l, 6% gal, 5% glcur, 4% 2omfuc, 3% 2omxyl, 6% apio-d, 2% acera, 4% kdo, 3% 3ddlhept, 53 sugars in total (http://www.ccrc.uga.edu/~mao/rg2/intro.htm, doi:10.1155/2011/964521)	C317H448O273	8620	fiber (soluble)	F	15.4968	0	1333.33	1083.33	0	0	4458.33	0	3.76452	0	710.68	376.683	0	0	1109.1	0	2200.23	0.255247	4.43342	No details on the composition of the dietary fiber. Assume uniform weight for each fiber in the model
rhamnogalurI[u]	potato rhamnogalacturonan i, mw assumed ~200000, 62 galur, 20 rmn, 12 gal, 3 arab-l, 1 xyl-d (www.megazyme.com, pmid: 16661590)	C5840H7862O5281	162438	fiber (soluble)	F	15.4968	0	1333.33	1083.33	0	0	4458.33	0	3.76452	0	710.68	376.683	0	0	1109.1	0	2200.23	0.0135451	0.235265	No details on the composition of the dietary fiber. Assume uniform weight for each fiber in the model
kestopt[u]	kestopentaose (4 fru, 1 glc inulin-type fructo-oligosaccharide)	C30H52O26	828	fiber (soluble)	F	15.4968	0	1333.33	1083.33	0	0	4458.33	0	3.76452	0	710.68	376.683	0	0	1109.1	0	2200.23	2.65728	46.1547	No details on the composition of the dietary fiber. Assume uniform weight for each fiber in the model
kestottr[u]	kestotetraose (3 fru, 1 glc inulin-type fructo-oligosaccharide)	C24H42O21	666	fiber (soluble)	F	15.4968	0	1333.33	1083.33	0	0	4458.33	0	3.76452	0	710.68	376.683	0	0	1109.1	0	2200.23	3.30365	57.3815	No details on the composition of the dietary fiber. Assume uniform weight for each fiber in the model
hdcea[u]	hexadecenoate (n-c16:1)	C16H29O2	253	lipid (mono-unsaturated FAs)	FA	210.121	83.75	21.25	4.16667	3.75	89.1667	0	0	51.043	2.52225	11.3265	1.44878	2.76741	8.26696	0	0	77.3748	0.305829	1.95552
ocdcea[u]	(9z)-octadecenoic/oleic acid	C18H33O2	281	lipid (mono-unsaturated FAs)	FA	2519.51	1421.25	2186.67	9.16667	207.5	25726.7	113.75	0	612.043	42.8029	1165.51	3.18731	153.13	2385.21	28.2977	0	4390.19	15.6234	99.8987
ttdcea[u]	tetradecenoate (n-c14:1)	C14H25O2	225	lipid (mono-unsaturated FAs)	FA	0	0	0	0	0	0	0	0	0	0	0	0	0	0	0	0	0	0	0
dca[u]	decanoate (n-c10:0)	C10H19O2	171	lipid (saturated FAs)	FA	1.11158	2.5	0.833333	0.416667	2.08333	0	0	0	0.270027	0.0752909	0.444175	0.144878	1.53745	0	0	0	2.47182	0.0144551	0.092428
ddca[u]	dodecanoate (n-c12:0)	C12H23O2	199	lipid (saturated FAs)	FA	10.2326	0	2.08333	0.833333	1.25	0	0	0	2.48572	0	1.11044	0.289756	0.922469	0	0	0	4.80838	0.0241627	0.1545
hdca[u]	hexadecanoate (palmitate)	C16H31O2	255	lipid (saturated FAs)	FA	1626.86	929.583	515.833	42.5	30.4167	1790.83	170.833	0	395.201	27.9957	274.944	14.7775	22.4467	166.035	42.4984	0	943.898	3.70156	23.6684
hxa[u]	hexanoate (n-c6:0)	C6H11O2	115	lipid (saturated FAs)	FA	0	0	0	0	0.833333	0	0	0	0	0	0	0	0.614979	0	0	0	0.614979	0.00534765	0.0341937
ocdca[u]	octadecanoate (stearate) (n-C18:0)	C18H35O2	283	lipid (saturated FAs)	FA	1113.31	337.917	260	2.08333	10.8333	869.583	8.33333	0	270.447	10.1768	138.583	0.72439	7.99473	80.6222	2.07309	0	510.62	1.80431	11.5371
octa[u]	octanoate (n-c8:0)	C8H15O2	143	lipid (saturated FAs)	FA	0	1.66667	0	0	1.25	0	0	0	0	0.0501939	0	0	0.922469	0	0	0	0.972663	0.00680184	0.043492
ttdca[u]	myristic_acid (n-C14:0)	C14H27O2	227	lipid (saturated FAs)	FA	142.326	13.75	5.83333	0.833333	10	0	0	0	34.5742	0.4141	3.10922	0.289756	7.37975	0	0	0	45.767	0.201617	1.28917
**The nutrients below were given bounds on uptake rates much larger than the estimated values to avoid over constraining the model. All vitamins below were given a bound of 0.1 mmol/hr/(gDW of community biomass) (the largest estimated rate is 0.007, assuming there are total 10 gDW of biomass in the gut). All minerals and other molecules below were given a bound of 1 mmol/hr/(gDW of community biom…
so3[u]	sulfite	HO3S	81.07	mineral	MV																	51.2215	0.631818	1.26364
so4[u]	slf|sulfuric acid|sulfate	O4S	96.07	mineral	MV																	51.2215	0.533168	1.06634
cl[u]	chloride	Cl	35.45	mineral	MV																	51.2215	1.44489	2.88979
cobalt2[u]	co2	Co	58.93	mineral	MV																	51.2215	0.869192	1.73838	essential for Bt, Fp, Ec, Lc
cu[u]	cu+	Cu	63.55	mineral	MV																	51.2215	0.806003	1.61201	essential for Fp, Lc
mobd[u]	molybdate	H2MoO4	161.94	mineral	MV																	51.2215	0.316299	0.632598	essential for Ec
ni2[u]	nickel	Ni	58.69	mineral	MV																	51.2215	0.872746	1.74549	essential for Ec
ca2[u]	ca(2+)|ca2+|calcium	Ca	40.08	mineral	MV																	51.2215	1.27798	2.55596
cu2[u]	copper|cu+|cu(i)|cu1+|copper1|cu(ii)|cu2+|copper2	Cu	63.55	mineral	MV																	51.2215	0.806003	1.61201
fe2[u]	fe2	Fe	55.85	mineral	MV																	51.2215	0.917126	0.917126
fe3[u]	fe3+	Fe	55.85	mineral	MV																	51.2215	0.917126	0.917126
k[u]	k	K	39.1	mineral	MV																	51.2215	1.31001	2.62003
mg2[u]	magnesium	Mg	24.3	mineral	MV																	51.2215	2.10788	4.21576
mn2[u]	mn(iii)|mn(ii)|mn2+|manganese	Mn	54.94	mineral	MV																	51.2215	0.932317	1.86463
na1[u]	na+	Na	23	mineral	MV																	51.2215	2.22702	4.45404
pi[u]	orthophosphate	HO4P	95.97	mineral	MV																	51.2215	1.65391	3.82079
seln[u]	selenide	H2Se	80.96	mineral	MV																	51.2215	0.632676	1.26535
zn2[u]	zinc	Zn	65.39	mineral	MV																	51.2215	0.783323	1.56665
fol[u]	folate	C19H17N7O6	439	vitamin	MV																	7.27861	0.01658	0.01658
nac[u]	nicotinate	C6H4NO2	122	vitamin	MV																	7.27861	0.0596607	0.0596607
pnto-R[u]	(r)-pantothenate	C9H16NO5	218	vitamin	MV																	7.27861	0.0333881	0.0333881
ribflv[u]	ribf|vitamin b2|7,8-dimethyl-10-ribitylisoalloxazine|lactoflavin|riboflavin	C17H20N4O6	376	vitamin	MV																	7.27861	0.019358	0.019358
thm[u]	thi|antiberiberi factor|aneurin|vitamin b1|thiamine|thiamin	C12H17N4OS	265.07	vitamin	MV																	7.27861	0.0274592	0.0274592
pydam[u]	pyridoxamine	C8H13N2O2	169	vitamin B-6	MV																	7.27861	0.0430687	0.0430687	Essential for Ef
pydx[u]	pyridoxal	C8H9NO3	167	vitamin B-6	MV																	7.27861	0.0435845	0.0435845	essential for Fp
pydxn[u]	pyridoxine	C8H11NO3	169	vitamin B-6	MV																	7.27861	0.0430687	0.0430687
cbl1[u]	cbl_e0	C62H89CoN13O14P	1328.9	vitamin B12	MV																	7.27861	0.00547717	0.00547717
adocbl[u]	adenosylcobalamin	C72H101CoN18O17P	1578.9	vitamin B12	MV																	7.27861	0.00460993	0.00460993	essential for Bt, Fp and Ec
chol[u]	choline	C5H14NO	104	vitamin B4	MV																	7.27861	0.0699866	0.0699866
ascb-L[u]	ascorbate	C6H7O6	175	vitamin C	MV																	7.27861	0.0415921	0.0415921
mqn10[u]	menaquinone 10	C61H88O2	853.36	vitamin K2	MV																	7.27861	0.00852936	0.00852936
mqn11[u]	menaquinone 11	C66H96O2	921.48	vitamin K2	MV																	7.27861	0.00789883	0.00789883
mqn7[u]	menaquinone 7	C46H64O2	649.01	vitamin K2	MV																	7.27861	0.0112149	0.0112149
mqn8[u]	menaquinone 8	C51H72O2	717.13	vitamin K2	MV																	7.27861	0.0101496	0.0101496
mqn9[u]	menaquinone 9	C56H80O	785.25	vitamin K2	MV																	7.27861	0.00926916	0.00926916
btn[u]	'biot_e0|biot|coenzyme r|vitamin h|d-biotin|biotin|biotin|||'	'C10H15N2O3S'	243.3	vitamin	MV																	7.27861	0.0299162	0.0299162	same weight as other vitamin
spmd[u]	n-(3-aminopropyl)-1,4-butane-diamine|spermidine|spermidine|spermidine_e0|spermidine||'	'C7H22N3'	148.27	polyamine	O																	10.0953	0.0680873	0.0680873	assume 100mg/kg food (should be more than actual)
h2o[u]	h2o	H2O	18	small molecules	O																	1000	1000	1000

## Sheet: consumption
Consumption table				Breakdown into macronutrient composition
	Total american consumption	pounds per year (http://www.usda.gov/factbook/chapter2.pdf)	gram per day	Carbohydrate (sugar + non-sugar carbohydrate)	AA	Fat	Fiber	Water	Ash	sugar	non-sugar non-fiber carbo	reference (from USDA food database)
	meat (boneless weight)	195.2	242.922	0.591359	23.6319	17.4307	0.0371924	56.9268	1.52272	0	0.591359	beef + pork + chicken
	Eggs (44g/egg)	250 eggs	30.1164	0.72	12.56	9.51	0	76.15	1.06	0.37	0.35	egg
	Vegetable	428.3	533.01	31.91	3	12.52	3.2	47.25	2.12	1.49	30.42	potato
	fruit (fresh weight)	279.4	347.707	20.24	1.09	0.33	2.6	74.91	0.82	12.23	8.01	banana
	dairy product	593	737.975	5.49	3.95	1.98	0	87.71	0.87	5.49	0	milk
	added fats and oils	74.5	92.7136	0	0	100	0	0	0	0	0	canola oil
	grain (mostly wheat flour)	199.9	248.771	61.27	13.21	2.5	10.7	10.74	1.58	0.41	60.86	wheat flour
	sweeteners (sugar)	152.4	189.658	76.79	0	0.2	0	22.81	0.2	76.77	0.02	corn syrup
	overall (gram per day)		2422.87	580.688	142.983	227.011	52.8055	1390.79	28.8995	237.713	342.975
			weight %	0.239669	0.0590137	0.0936951	0.0217946	0.574026	0.0119278	0.0981122	0.141557
			dry weight %	0.57867	0.142486	0.226222	0.052622
Transpose of the table (for calculation in the sheet 'uptake')
	Total american consumption	meat (boneless weight)	Eggs (44g/egg)	Vegetable	fruit (fresh weight)	dairy product	added fats and oils	grain (mostly wheat flour)	sweeteners (sugar)		overall (gram per day)
	pounds per year (http://www.usda.gov/factbook/chapter2.pdf)	195.2	250 eggs	428.3	279.4	593	74.5	199.9	152.4
	gram per day	242.922	30.1164	533.01	347.707	737.975	92.7136	248.771	189.658		2422.87		weight %	dry weight %
Breakdown into macronutrient composition	Carbohydrate (sugar + non-sugar carbohydrate)	0.591359	0.72	31.91	20.24	5.49	0	61.27	76.79		580.688		0.239669	0.57867
	AA	23.6319	12.56	3	1.09	3.95	0	13.21	0		142.983		0.0590137	0.142486
	Fat	17.4307	9.51	12.52	0.33	1.98	100	2.5	0.2		227.011		0.0936951	0.226222
	Fiber	0.0371924	0	3.2	2.6	0	0	10.7	0		52.8055		0.0217946	0.052622
	Water	56.9268	76.15	47.25	74.91	87.71	0	10.74	22.81		1390.79		0.574026
	Ash	1.52272	1.06	2.12	0.82	0.87	0	1.58	0.2		28.8995		0.0119278
												upper bound for mineral and vitamin (mg/hr)
	mineral (upper bound)	2.42922	0.301164	5.86311	3.47707	7.37975	0	2.48771	0.189658		22.1277	921.987
	vitamin (upper bound)	0.0242922	0.0903491	0.53301	0.347707	0.0737975	0.0927136	0.497542	0.000111898		1.65952	69.1468
	reference (from USDA food database)	beef + pork + chicken	egg	potato	banana	milk	canola oil	wheat flour	corn syrup
Matching between names in USDA and names of community metabolites in the model
16:1 undifferentiated	16:1 undifferentiated	hdcea[u]
18:1 undifferentiated	18:1 undifferentiated	ocdcea[u]
10:00:00	10:00	dca[u]
12:00:00	12:00	ddca[u]
16:00:00	16:00	hdca[u]
18:00:00	18:00	ocdca[u]
14:00:00	14:00	ttdca[u]
06:00:00	6:00	hxa[u]
08:00:00	8:00	octa[u]
04:00:00	4:00	but[u]
14:1 undifferentiated	14:1	ttdcea[u]
Tryptophan		trp-L[u]
Threonine		thr-L[u]
Isoleucine		ile-L[u]
Leucine		leu-L[u]
Lysine		lys-L[u]
Methionine		met-L[u]
Cystine		cys-L[u]
Phenylalanine		phe-L[u]
Tyrosine		tyr-L[u]
Valine		val-L[u]
Arginine		arg-L[u]
Histidine		his-L[u]
Alanine		ala-L[u]
Aspartic acid		asp-L[u]
Glutamic acid		glu-L[u]
Glycine		gly[u]
Proline		pro-L[u]
Serine		ser-L[u]

## Sheet: meat
Beef			Pork			Chicken			Weighted average		Community metabolites in the model
Source: USDA National Nutrient Database for Standard Reference 28 Software v.2.3.4.2			Source: USDA National Nutrient Database for Standard Reference 28 Software v.2.3.4.2			Source: USDA National Nutrient Database for Standard Reference 28 Software v.2.3.4.2
Full Report (All Nutrients)			Full Report (All Nutrients)			Full Report (All Nutrients)
Report Run at: January 16	2016 18:57 EST		Report Run at: January 16	2016 18:58 EST		Report Run at: January 16	2016 19:05 EST
Nutrient data for: 13330, Beef, variety meats and by-products, mechanically separated beef, raw			Nutrient data for: 10220, Pork, fresh, ground, cooked			Nutrient data for: 05012, Chicken, broilers or fryers, meat only, cooked, fried
Food Group: Beef Products			Food Group: Pork Products			Food Group: Poultry Products
Common Name:			Common Name:			Common Name:
Carbohydrate Factor: 3.87 Fat Factor: 9.02 Protein Factor: 4.27 Nitrogen to Protein Conversion Factor: 6.25			Carbohydrate Factor: 3.87 Fat Factor: 9.02 Protein Factor: 4.27 Nitrogen to Protein Conversion Factor: 6.25			Carbohydrate Factor: 3.87 Fat Factor: 9.02 Protein Factor: 4.27 Nitrogen to Protein Conversion Factor: 6.25
						Refuse: 42% Refuse Description: 29% bone	13% skin
Nutrient	Unit	1Value per 100 g	Nutrient	Unit	1Value per 100 g	Nutrient	Unit	1Value per 100 g	Weighted average		mets	g/100g
Proximates			Proximates			Proximates
Water	g	59.39	Water	g	52.75	Water	g	57.53	56.9268
Energy	kcal	276	Energy	kcal	297	Energy	kcal	219	260.403
Energy	kJ	1155	Energy	kJ	1243	Energy	kJ	916	1089.59
Protein	g	14.97	Protein	g	25.69	Protein	g	30.57	23.6319
Total lipid (fat)	g	23.52	Total lipid (fat)	g	20.77	Total lipid (fat)	g	9.12	17.4307
Ash	g	2.14	Ash	g	1.29	Ash	g	1.09	1.52272
Carbohydrate, by difference	g	0	Carbohydrate, by difference	g	0	Carbohydrate, by difference	g	1.69	0.628551
Fiber, total dietary	g	0	Fiber, total dietary	g	0	Fiber, total dietary	g	0.1	0.0371924
			Sugars, total	g	0	Sugars, total	g	0	0
Minerals			Minerals			Minerals			0
Calcium, Ca	mg	485	Calcium, Ca	mg	22	Calcium, Ca	mg	17	187.421
Iron, Fe	mg	5.67	Iron, Fe	mg	1.29	Iron, Fe	mg	1.35	2.8948
Magnesium, Mg	mg	17	Magnesium, Mg	mg	24	Magnesium, Mg	mg	27	22.5867
Phosphorus, P	mg	324	Phosphorus, P	mg	226	Phosphorus, P	mg	205	253.597
Potassium, K	mg	277	Potassium, K	mg	362	Potassium, K	mg	257	292.238
Sodium, Na	mg	57	Sodium, Na	mg	73	Sodium, Na	mg	91	73.9139
Zinc, Zn	mg	3.58	Zinc, Zn	mg	3.21	Zinc, Zn	mg	2.24	2.98291
Copper, Cu	mg	0.056	Copper, Cu	mg	0.044	Copper, Cu	mg	0.075	0.0598652
Manganese, Mn	mg	0.012	Manganese, Mn	mg	0.011	Manganese, Mn	mg	0.028	0.017684
Selenium, Se	μg	20.7	Selenium, Se	μg	35.4	Selenium, Se	μg	24.5	26.035
Vitamins			Vitamins			Vitamins			0
Vitamin C, total ascorbic acid	mg	0	Vitamin C, total ascorbic acid	mg	0.7	Vitamin C, total ascorbic acid	mg	0	0.186745
Thiamin	mg	0.072	Thiamin	mg	0.706	Thiamin	mg	0.085	0.245973
Riboflavin	mg	0.118	Riboflavin	mg	0.22	Riboflavin	mg	0.198	0.174965
Niacin	mg	2.546	Niacin	mg	4.206	Niacin	mg	9.663	5.63584
Pantothenic acid	mg	0.279	Pantothenic acid	mg	0.52	Pantothenic acid	mg	1.166	0.67319
Vitamin B-6	mg	0.29	Vitamin B-6	mg	0.391	Vitamin B-6	mg	0.48	0.38761
Folate, total	μg	5	Folate, total	μg	6	Folate, total	μg	7	6.01063
Folic acid	μg	0	Folic acid	μg	0	Folic acid	μg	0	0
Folate, food	μg	5	Folate, food	μg	6	Folate, food	μg	7	6.01063
Folate, DFE	μg	5	Folate, DFE	μg	6	Folate, DFE	μg	7	6.01063
Vitamin B-12	μg	2.56	Choline, total	mg	88.3	Choline, total	mg	91.2	58.4009
Vitamin A, RAE	μg	0	Betaine	mg	3.4	Betaine	mg	6.6	3.36174
Retinol	μg	0	Vitamin B-12	μg	0.54	Vitamin B-12	μg	0.34	0.270515
Vitamin A, IU	IU	0	Vitamin B-12, added	μg	0	Vitamin B-12, added	μg	0	0
			Vitamin A, RAE	μg	2	Vitamin A, RAE	μg	18	7.22819
			Retinol	μg	2	Retinol	μg	18	7.22819
			Carotene, beta	μg	0	Carotene, beta	μg	0	0
			Carotene, alpha	μg	0	Carotene, alpha	μg	0	0
			Cryptoxanthin, beta	μg	0	Cryptoxanthin, beta	μg	0	0
			Vitamin A, IU	IU	8	Vitamin A, IU	IU	59	24.0777
			Lycopene	μg	0	Lycopene	μg	0	0
			Lutein + zeaxanthin	μg	0	Lutein + zeaxanthin	μg	0	0
			Vitamin E (alpha-tocopherol)	mg	0.21	Vitamin E (alpha-tocopherol)	mg	0.46	0.227109
			Vitamin E, added	mg	0	Vitamin E, added	mg	0	0
			Vitamin D (D2 + D3)	μg	0.5	Vitamin D (D2 + D3)	μg	0.1	0.170582
			Vitamin D3 (cholecalciferol)	μg	0.5	Vitamin D3 (cholecalciferol)	μg	0.1	0.170582
			Vitamin D	IU	21	Vitamin D	IU	5	7.46197
			Vitamin K (phylloquinone)	μg	0	Vitamin K (phylloquinone)	μg	2.8	1.04139
Lipids			Lipids			Lipids
Fatty acids, total saturated	g	11.78	Fatty acids, total saturated	g	7.72	Fatty acids, total saturated	g	2.46	g/100g meat
04:00:00	g	0	04:00:00	g	0	04:00:00	g	0	0		but[u]	0
06:00:00	g	0	06:00:00	g	0	06:00:00	g	0	0		hxa[u]	0
08:00:00	g	0	08:00:00	g	0	08:00:00	g	0	0		octa[u]	0
10:00:00	g	0	10:00:00	g	0.01	10:00:00	g	0	0.00266779		dca[u]	0.00266779
12:00:00	g	0.04	12:00:00	g	0.01	12:00:00	g	0.02	0.0245582		ddca[u]	0.0245582
14:00:00	g	0.64	14:00:00	g	0.33	14:00:00	g	0.06	0.341583		ttdca[u]	0.341583
16:00:00	g	5.66	16:00:00	g	4.67	16:00:00	g	1.65	3.90447		hdca[u]	3.90447
18:00:00	g	4.87	18:00:00	g	2.5	18:00:00	g	0.66	2.67194		ocdca[u]	2.67194
Fatty acids, total monounsaturated	g	8.44	Fatty acids, total monounsaturated	g	9.25	Fatty acids, total monounsaturated	g	3.35	6.763
16:1 undifferentiated	g	0.56	16:1 undifferentiated	g	0.63	16:1 undifferentiated	g	0.36	0.50429		hdcea[u]	0.50429
18:1 undifferentiated	g	7.59	18:1 undifferentiated	g	8.33	18:1 undifferentiated	g	2.91	6.04681		ocdcea[u]	6.04681
20:01:00	g	0.07	20:01:00	g	0.15	20:01:00	g	0.04	0.0801846
22:1 undifferentiated	g	0	22:1 undifferentiated	g	0	22:1 undifferentiated	g	0	0
Fatty acids, total polyunsaturated	g	0.76	Fatty acids, total polyunsaturated	g	1.87	Fatty acids, total polyunsaturated	g	2.15	1.5731
18:2 undifferentiated	g	0.59	18:2 undifferentiated	g	1.64	18:2 undifferentiated	g	1.78	1.31271
18:3 undifferentiated	g	0.17	18:3 undifferentiated	g	0.07	18:3 undifferentiated	g	0.09	0.113568
18:04:00	g	0	18:04:00	g	0	18:04:00	g	0	0
20:4 undifferentiated	g	0	20:4 undifferentiated	g	0.08	20:4 undifferentiated	g	0.12	0.0659732
20:5 n-3 (EPA)	g	0	20:5 n-3 (EPA)	g	0	20:5 n-3 (EPA)	g	0.01	0.00371924
22:5 n-3 (DPA)	g	0	22:5 n-3 (DPA)	g	0	22:5 n-3 (DPA)	g	0.03	0.0111577
22:6 n-3 (DHA)	g	0	22:6 n-3 (DHA)	g	0	22:6 n-3 (DHA)	g	0.05	0.0185962
Cholesterol	mg	209	Cholesterol	mg	94	Cholesterol	mg	94	0.135549
Amino Acids			Amino Acids			Amino Acids
Tryptophan	g	0.168	Tryptophan	g	0.326	Tryptophan	g	0.358	0.280817		trp-L[u]	0.280817
Threonine	g	0.474	Threonine	g	1.173	Threonine	g	1.289	0.963596		thr-L[u]	0.963596
Isoleucine	g	0.584	Isoleucine	g	1.203	Isoleucine	g	1.612	1.13147		ile-L[u]	1.13147
Leucine	g	1.199	Leucine	g	2.061	Leucine	g	2.294	1.83622		leu-L[u]	1.83622
Lysine	g	1.161	Lysine	g	2.31	Lysine	g	2.583	1.9964		lys-L[u]	1.9964
Methionine	g	0.426	Methionine	g	0.68	Methionine	g	0.844	0.649226		met-L[u]	0.649226
Cystine	g	0.23	Cystine	g	0.328	Cystine	g	0.393	0.316768		cys-L[u]	0.316768
Phenylalanine	g	0.644	Phenylalanine	g	1.025	Phenylalanine	g	1.217	0.958755		phe-L[u]	0.958755
Tyrosine	g	0.381	Tyrosine	g	0.895	Tyrosine	g	1.031	0.759875		tyr-L[u]	0.759875
Valine	g	0.915	Valine	g	1.394	Valine	g	1.516	1.26631		val-L[u]	1.26631
Arginine	g	1.154	Arginine	g	1.597	Arginine	g	1.839	1.52695		arg-L[u]	1.52695
Histidine	g	0.443	Histidine	g	1.026	Histidine	g	0.947	0.785982		his-L[u]	0.785982
Alanine	g	1.005	Alanine	g	1.497	Alanine	g	1.663	1.38098		ala-L[u]	1.38098
Aspartic acid	g	1.312	Aspartic acid	g	2.383	Aspartic acid	g	2.714	2.11916		asp-L[u]	2.11916
Glutamic acid	g	2.121	Glutamic acid	g	4.022	Glutamic acid	g	4.632	3.56205		glu-L[u]	3.56205
Glycine	g	1.238	Glycine	g	1.22	Glycine	g	1.499	1.33027		gly[u]	1.33027
Proline	g	0.922	Proline	g	1.032	Proline	g	1.277	1.08338		pro-L[u]	1.08338
Serine	g	0.57	Serine	g	1.061	Serine	g	1.057	0.882115		ser-L[u]	0.882115
Other			Other			Other			0
			Alcohol, ethyl	g	0	Alcohol, ethyl	g	0	0
			Caffeine	mg	0	Caffeine	mg	0	0
			Theobromine	mg	0	Theobromine	mg	0	0
									sum of weight
Weight factor (page 15 in United States Deparment of Agriculture. Agriculture Fact Book 2001-2002 [Internet]. 2003 [cited 2016 Apr 13]. p. 174. Available from: http://www.usda.gov/documents/usda-factbook-2001-2002.pdf)		64.6			47.7			66.5	178.8
normalized		0.361298			0.266779			0.371924

## Sheet: egg
Egg			Community metabolites in the model
Source: USDA National Nutrient Database for Standard Reference 28 Software v.2.3.4.2
Full Report (All Nutrients)
Report Run at: January 19	2016 15:48 EST
Nutrient data for: 01123, Egg, whole, raw, fresh
Food Group: Dairy and Egg Products
Common Name:
Carbohydrate Factor: 3.68 Fat Factor: 9.02 Protein Factor: 4.36 Nitrogen to Protein Conversion Factor: 6.25
Refuse: 12% Refuse Description: Shell
Nutrient	Unit	1Value per 100 g	mets	g/100g
Proximates
Water	g	76.15
Energy	kcal	143
Energy	kJ	599
Protein	g	12.56
Total lipid (fat)	g	9.51
Ash	g	1.06
Carbohydrate, by difference	g	0.72
Fiber, total dietary	g	0
Sugars, total	g	0.37
Sucrose	g	0	sucr[u]	0
Glucose (dextrose)	g	0.37	glc-D[u]	0.37
Fructose	g	0	fru[u]	0
Lactose	g	0	lcts[u]	0
Maltose	g	0	malt[u]	0
Galactose	g	0	gal[u]	0
Minerals
Calcium, Ca	mg	56
Iron, Fe	mg	1.75
Magnesium, Mg	mg	12
Phosphorus, P	mg	198
Potassium, K	mg	138
Sodium, Na	mg	142
Zinc, Zn	mg	1.29
Copper, Cu	mg	0.072
Manganese, Mn	mg	0.028
Selenium, Se	µg	30.7
Fluoride, F	µg	1.1
Vitamins
Vitamin C, total ascorbic acid	mg	0
Thiamin	mg	0.04
Riboflavin	mg	0.457
Niacin	mg	0.075
Pantothenic acid	mg	1.533
Vitamin B-6	mg	0.17
Folate, total	µg	47
Folic acid	µg	0
Folate, food	µg	47
Folate, DFE	µg	47
Choline, total	mg	293.8
Betaine	mg	0.3
Vitamin B-12	µg	0.89
Vitamin B-12, added	µg	0
Vitamin A, RAE	µg	160
Retinol	µg	160
Carotene, beta	µg	0
Carotene, alpha	µg	0
Cryptoxanthin, beta	µg	9
Vitamin A, IU	IU	540
Lycopene	µg	0
Lutein + zeaxanthin	µg	503
Vitamin E (alpha-tocopherol)	mg	1.05
Vitamin E, added	mg	0
Tocopherol, beta	mg	0.01
Tocopherol, gamma	mg	0.5
Tocopherol, delta	mg	0.06
Vitamin D (D2 + D3)	µg	2
Vitamin D3 (cholecalciferol)	µg	2
Vitamin D	IU	82
Vitamin K (phylloquinone)	µg	0.3
Lipids
Fatty acids, total saturated	g	3.126
04:00:00	g	0.004	but[u]	0.004
06:00:00	g	0	hxa[u]	0
08:00:00	g	0.004	octa[u]	0.004
10:00:00	g	0.006	dca[u]	0.006
12:00:00	g	0	ddca[u]	0
14:00:00	g	0.033	ttdca[u]	0.033
15:00:00	g	0.008
16:00:00	g	2.231	hdca[u]	2.231
17:00:00	g	0.022
18:00:00	g	0.811	ocdca[u]	0.811
20:00:00	g	0.003
22:00:00	g	0.004
1 day, 0:00:00	g	0
Fatty acids, total monounsaturated	g	3.658
14:01:00	g	0.007
15:01:00	g	0
16:1 undifferentiated	g	0.201	hdcea[u]	0.201
16:1 c	g	0.198
16:1 t	g	0.003
17:01:00	g	0.012
18:1 undifferentiated	g	3.411	ocdcea[u]	3.411
18:1 c	g	3.388
18:1 t	g	0.023
20:01:00	g	0.027
22:1 undifferentiated	g	0
22:1 c	g	0
22:1 t	g	0
24:1 c	g	0
Fatty acids, total polyunsaturated	g	1.911
18:2 undifferentiated	g	1.555
18:2 n-6 c,c	g	1.531
18:2 CLAs	g	0.012
18:2 t not further defined	g	0.012
18:3 undifferentiated	g	0.048
18:3 n-3 c,c,c (ALA)	g	0.036
18:3 n-6 c,c,c	g	0.012
18:04:00	g	0
20:2 n-6 c,c	g	0.018
20:3 undifferentiated	g	0.023
20:3 n-6	g	0.022
20:4 undifferentiated	g	0.188
20:5 n-3 (EPA)	g	0
22:04:00	g	0.013
22:5 n-3 (DPA)	g	0.007
22:6 n-3 (DHA)	g	0.058
Fatty acids, total trans	g	0.038
Fatty acids, total trans-monoenoic	g	0.026
Cholesterol	mg	372
Amino Acids
Tryptophan	g	0.167	trp-L[u]	0.167
Threonine	g	0.556	thr-L[u]	0.556
Isoleucine	g	0.671	ile-L[u]	0.671
Leucine	g	1.086	leu-L[u]	1.086
Lysine	g	0.912	lys-L[u]	0.912
Methionine	g	0.38	met-L[u]	0.38
Cystine	g	0.272	cys-L[u]	0.272
Phenylalanine	g	0.68	phe-L[u]	0.68
Tyrosine	g	0.499	tyr-L[u]	0.499
Valine	g	0.858	val-L[u]	0.858
Arginine	g	0.82	arg-L[u]	0.82
Histidine	g	0.309	his-L[u]	0.309
Alanine	g	0.735	ala-L[u]	0.735
Aspartic acid	g	1.329	asp-L[u]	1.329
Glutamic acid	g	1.673	glu-L[u]	1.673
Glycine	g	0.432	gly[u]	0.432
Proline	g	0.512	pro-L[u]	0.512
Serine	g	0.971	ser-L[u]	0.971
Other
Alcohol, ethyl	g	0
Caffeine	mg	0
Theobromine	mg	0
Flavonoids
Isoflavones
Daidzein	mg	0.02
Genistein	mg	0.02
Glycitein	mg	0
Total isoflavones	mg	0.05
Biochanin A	mg	0.05
Formononetin	mg	0.05
Coumestrol	mg	0

## Sheet: potato
Potato			Community metabolites in the model
Source: USDA National Nutrient Database for Standard Reference 28 Software v.2.3.4.2
Full Report (All Nutrients)
Report Run at: January 16	2016 19:16 EST
Nutrient data for: 11370, Potatoes, hash brown, home-prepared
Food Group: Vegetables and Vegetable Products
Common Name:Potatoes	hashed brown
Nutrient	Unit	1Value per 100 g	mets	g/100g
Proximates
Water	g	47.25
Energy	kcal	265
Energy	kJ	1109
Protein	g	3
Total lipid (fat)	g	12.52
Ash	g	2.12
Carbohydrate, by difference	g	35.11
Fiber, total dietary	g	3.2
Sugars, total	g	1.49
Sucrose	g	0.33	sucr[u]	0.33
Glucose (dextrose)	g	0.64	glc-D[u]	0.64
Fructose	g	0.52	fru[u]	0.52
Lactose	g	0	lcts[u]	0
Maltose	g	0	malt[u]	0
Galactose	g	0	gal[u]	0
Minerals
Calcium, Ca	mg	14
Iron, Fe	mg	0.55
Magnesium, Mg	mg	35
Phosphorus, P	mg	70
Potassium, K	mg	576
Sodium, Na	mg	342
Zinc, Zn	mg	0.47
Copper, Cu	mg	0.293
Manganese, Mn	mg	0.247
Selenium, Se	μg	0.5
Fluoride, F	μg	0
Vitamins
Vitamin C, total ascorbic acid	mg	13
Thiamin	mg	0.172
Riboflavin	mg	0.033
Niacin	mg	2.302
Pantothenic acid	mg	0.893
Vitamin B-6	mg	0.472
Folate, total	μg	16
Folic acid	μg	0
Folate, food	μg	16
Folate, DFE	μg	16
Choline, total	mg	23.2
Betaine	mg	0.3
Vitamin B-12	μg	0
Vitamin B-12, added	μg	0
Vitamin A, RAE	μg	0
Retinol	μg	0
Carotene, beta	μg	3
Carotene, alpha	μg	0
Cryptoxanthin, beta	μg	0
Vitamin A, IU	IU	5
Lycopene	μg	0
Lutein + zeaxanthin	μg	16
Vitamin E (alpha-tocopherol)	mg	0.01
Vitamin E, added	mg	0
Tocopherol, beta	mg	0
Tocopherol, gamma	mg	0
Tocopherol, delta	mg	0
Vitamin D (D2 + D3)	μg	0
Vitamin D	IU	0
Vitamin K (phylloquinone)	μg	3.7
Lipids
Fatty acids, total saturated	g	1.883
04:00:00	g	0	but[u]	0
06:00:00	g	0	hxa[u]	0
08:00:00	g	0	octa[u]	0
10:00:00	g	0.002	dca[u]	0.002
12:00:00	g	0.005	ddca[u]	0.005
14:00:00	g	0.014	ttdca[u]	0.014
16:00:00	g	1.238	hdca[u]	1.238
18:00:00	g	0.624	ocdca[u]	0.624
Fatty acids, total monounsaturated	g	5.299
16:1 undifferentiated	g	0.051	hdcea[u]	0.051
18:1 undifferentiated	g	5.248	ocdcea[u]	5.248
20:01:00	g	0
22:1 undifferentiated	g	0
Fatty acids, total polyunsaturated	g	4.703
18:2 undifferentiated	g	4.364
18:3 undifferentiated	g	0.338
18:04:00	g	0
20:4 undifferentiated	g	0
20:5 n-3 (EPA)	g	0
22:5 n-3 (DPA)	g	0
22:6 n-3 (DHA)	g	0
Cholesterol	mg	0
Phytosterols	mg	0
Amino Acids
Tryptophan	g	0.047	trp-L[u]	0.047
Threonine	g	0.109	thr-L[u]	0.109
Isoleucine	g	0.123	ile-L[u]	0.123
Leucine	g	0.181	leu-L[u]	0.181
Lysine	g	0.182	lys-L[u]	0.182
Methionine	g	0.047	met-L[u]	0.047
Cystine	g	0.039	cys-L[u]	0.039
Phenylalanine	g	0.133	phe-L[u]	0.133
Tyrosine	g	0.112	tyr-L[u]	0.112
Valine	g	0.168	val-L[u]	0.168
Arginine	g	0.139	arg-L[u]	0.139
Histidine	g	0.067	his-L[u]	0.067
Alanine	g	0.093	ala-L[u]	0.093
Aspartic acid	g	0.735	asp-L[u]	0.735
Glutamic acid	g	0.504	glu-L[u]	0.504
Glycine	g	0.089	gly[u]	0.089
Proline	g	0.109	pro-L[u]	0.109
Serine	g	0.132	ser-L[u]	0.132
Other
Alcohol, ethyl	g	0
Caffeine	mg	0
Theobromine	mg	0

## Sheet: banana
Banana			Community metabolites in the model
Source: USDA National Nutrient Database for Standard Reference 28 Software v.2.3.4.2
Full Report (All Nutrients)
Report Run at: January 19	2016 15:27 EST
Nutrient data for: 09040, Bananas, raw
Food Group: Fruits and Fruit Juices
Common Name:
Carbohydrate Factor: 3.6 Fat Factor: 8.37 Protein Factor: 3.36 Nitrogen to Protein Conversion Factor: 6.25
Refuse: 36% Refuse Description: Skin
Nutrient	Unit	1Value per 100 g	mets	g/100g
Proximates
Water	g	74.91
Energy	kcal	89
Energy	kJ	371
Protein	g	1.09
Total lipid (fat)	g	0.33
Ash	g	0.82
Carbohydrate, by difference	g	22.84
Fiber, total dietary	g	2.6
Sugars, total	g	12.23
Sucrose	g	2.39	sucr[u]	2.39
Glucose (dextrose)	g	4.98	glc-D[u]	4.98
Fructose	g	4.85	fru[u]	4.85
Lactose	g	0	lcts[u]	0
Maltose	g	0.01	malt[u]	0.01
Galactose	g	0	gal[u]	0
Starch	g	5.38
Minerals
Calcium, Ca	mg	5
Iron, Fe	mg	0.26
Magnesium, Mg	mg	27
Phosphorus, P	mg	22
Potassium, K	mg	358
Sodium, Na	mg	1
Zinc, Zn	mg	0.15
Copper, Cu	mg	0.078
Manganese, Mn	mg	0.27
Selenium, Se	µg	1
Fluoride, F	µg	2.2
Vitamins
Vitamin C, total ascorbic acid	mg	8.7
Thiamin	mg	0.031
Riboflavin	mg	0.073
Niacin	mg	0.665
Pantothenic acid	mg	0.334
Vitamin B-6	mg	0.367
Folate, total	µg	20
Folic acid	µg	0
Folate, food	µg	20
Folate, DFE	µg	20
Choline, total	mg	9.8
Betaine	mg	0.1
Vitamin B-12	µg	0
Vitamin B-12, added	µg	0
Vitamin A, RAE	µg	3
Retinol	µg	0
Carotene, beta	µg	26
Carotene, alpha	µg	25
Cryptoxanthin, beta	µg	0
Vitamin A, IU	IU	64
Lycopene	µg	0
Lutein + zeaxanthin	µg	22
Vitamin E (alpha-tocopherol)	mg	0.1
Vitamin E, added	mg	0
Tocopherol, beta	mg	0
Tocopherol, gamma	mg	0.02
Tocopherol, delta	mg	0.01
Vitamin D (D2 + D3)	µg	0
Vitamin D	IU	0
Vitamin K (phylloquinone)	µg	0.5
Lipids
Fatty acids, total saturated	g	0.112
04:00:00	g	0	but[u]	0
06:00:00	g	0	hxa[u]	0
08:00:00	g	0	octa[u]	0
10:00:00	g	0.001	dca[u]	0.001
12:00:00	g	0.002	ddca[u]	0.002
14:00:00	g	0.002	ttdca[u]	0.002
16:00:00	g	0.102	hdca[u]	0.102
18:00:00	g	0.005	ocdca[u]	0.005
Fatty acids, total monounsaturated	g	0.032
16:1 undifferentiated	g	0.01	hdcea[u]	0.01
18:1 undifferentiated	g	0.022	ocdcea[u]	0.022
20:01:00	g	0
22:1 undifferentiated	g	0
Fatty acids, total polyunsaturated	g	0.073
18:2 undifferentiated	g	0.046
18:3 undifferentiated	g	0.027
18:04:00	g	0
20:4 undifferentiated	g	0
20:5 n-3 (EPA)	g	0
22:5 n-3 (DPA)	g	0
22:6 n-3 (DHA)	g	0
Fatty acids, total trans	g	0
Cholesterol	mg	0
Phytosterols	mg	16
Amino Acids
Tryptophan	g	0.009	trp-L[u]	0.009
Threonine	g	0.028	thr-L[u]	0.028
Isoleucine	g	0.028	ile-L[u]	0.028
Leucine	g	0.068	leu-L[u]	0.068
Lysine	g	0.05	lys-L[u]	0.05
Methionine	g	0.008	met-L[u]	0.008
Cystine	g	0.009	cys-L[u]	0.009
Phenylalanine	g	0.049	phe-L[u]	0.049
Tyrosine	g	0.009	tyr-L[u]	0.009
Valine	g	0.047	val-L[u]	0.047
Arginine	g	0.049	arg-L[u]	0.049
Histidine	g	0.077	his-L[u]	0.077
Alanine	g	0.04	ala-L[u]	0.04
Aspartic acid	g	0.124	asp-L[u]	0.124
Glutamic acid	g	0.152	glu-L[u]	0.152
Glycine	g	0.038	gly[u]	0.038
Proline	g	0.028	pro-L[u]	0.028
Serine	g	0.04	ser-L[u]	0.04
Other
Alcohol, ethyl	g	0
Caffeine	mg	0
Theobromine	mg	0
Flavonoids
Anthocyanidins
Cyanidin	mg	0
Petunidin	mg	0
Delphinidin	mg	0
Malvidin	mg	0
Pelargonidin	mg	0
Peonidin	mg	0
Flavan-3-ols
(+)-Catechin	mg	6.1
(-)-Epigallocatechin	mg	0
(-)-Epicatechin	mg	0
(-)-Epicatechin 3-gallate	mg	0
(-)-Epigallocatechin 3-gallate	mg	0
(+)-Gallocatechin	mg	0
Flavanones
Hesperetin	mg	0
Naringenin	mg	0
Flavones
Apigenin	mg	0
Luteolin	mg	0
Flavonols
Kaempferol	mg	0.1
Myricetin	mg	0
Quercetin	mg	0.1
Isoflavones
Daidzein	mg	0
Genistein	mg	0
Glycitein	mg	0
Total isoflavones	mg	0
Formononetin	mg	0
Coumestrol	mg	0
Proanthocyanidin
Proanthocyanidin dimers	mg	0.4
Proanthocyanidin trimers	mg	0.4
Proanthocyanidin 4-6mers	mg	1.9
Proanthocyanidin 7-10mers	mg	0
Proanthocyanidin polymers (>10mers)	mg	0
Sources of Data
1	Produce Marketing Association (PMA)	Nutrient Content of Banana
2	Nutrient Data Laboratory, ARS, USDA	National Food and Nutrient Analysis Program Wave 5g
3	Nutrient Data Laboratory, ARS, USDA	National Food and Nutrient Analysis Program Wave 4f
4	Nutrient Data Laboratory, ARS, USDA	NDL Report Vitamin E 1991
5	Nutrient Data Laboratory, ARS, USDA	NDL Report Vitamin E 1997
6	J Marlett	Content and composition of dietary fiber in 117 frequently consumed foods
7	National Cancer Institute (NCI), DHHS	Total dietary fiber content of selected foods
8	Food and Drug Administration (FDA), DHHS	FDA Total Diet Study
9	Food and Drug Administration (FDA), DHHS	FDA Total Diet Study
10	Food and Drug Administration (FDA), DHHS	FDA Total Diet Study
11	Food and Drug Administration (FDA), DHHS	FDA Total Diet Study
12	Food and Drug Administration (FDA), DHHS	FDA Total Diet Study
13	Food and Drug Administration (FDA), DHHS	FDA Total Diet Study
14	Food and Drug Administration (FDA), DHHS	FDA Total Diet Study
15	Food and Drug Administration (FDA), DHHS	FDA Total Diet Study
16	Food and Drug Administration (FDA), DHHS	FDA Total Diet Study
17	Food and Drug Administration (FDA), DHHS	FDA Total Diet Study
18	Food and Drug Administration (FDA), DHHS	FDA Total Diet Study
19	S.L. Booth, J.A. Sadowski, J.A. T. Pennington	Phylloquinone (Vitamin K) Content of Foods in the U.S. Food and Drug Administration's Total Diet Study
20	G. Ferland, D. MacDonald, J.A. Sadowski	Development of a diet low in vitamin K (phylloquinone)
21	de Pascual-Teresa, S., Santos-Buelga, C., and Rivas-Gonzalo, J.C.	Quantitative analysis of flavan-3-ols in Spanish foodstuffs and beverages
22	Gu, L., Kelm, M.A., Hammerstone, J.F., Beecher, G., Holden, J., Haytowitz, D., Gebhardt, S., and Prior, R.L.	Concentrations of proanthocyanidins in common foods and estimations of normal consumption
23	Hellström, Törrönen, A.R., and Matilla, P.H.	Proanthocyanidins in common food products of plant origin
24	Harnly, J. M., Doherty, R., Beecher, G. R., Holden, J. M., Haytowitz, D. B., and Bhagwat, S., and Gebhardt S.	Flavonoid content of U.S. fruits, vegetables, and nuts
25	Pei et al	Unpublished data
26	Arts, I. C. W., van de Putte, B., and Hollman, P. C. H.	Catechin content of foods commonly consumed in the Netherlands. 1. Fruits, vegetables, staple foods and processed foods.
27	de Pascual-Teresa, S., Santos-Buelga, C., & Rivas-Gonzalo, J.C.	Quantitative analysis of flavan-3-ols in Spanish foodstuffs and beverages.
28	del Mar Verde MJndez, C., Foster, M.P., Rodríguez-Delgado, M.Á., Rodríguez-Rodríguez, E.M., and Romero, C.D.	Content of free phenolic compounds in bananas from Tenerife (Canary Islands) and Ecuador.
29	Lugasi, A. and Hovari, J.	Flavonoid aglycons in foods of plant origin II. Fresh and dried fruits.
30	Kevers, C., Falkowski, M., Tabart, J., Defraigne, J-O., Dommes, J., and Pincemail, J.	Evolution of antioxidant capacity during storage of selected fruits and vegetables
31	Lako, J., Trenerry, V. C., Wahlqvist, M., Wattanapenpaiboon, N., Sotheeswaran, S., Premier, R.	Phytochemical flavonols, carotenoids and the antioxidant properties of a wide selection of Fijian fruit, vegetables and other readily available foods.
32	Horn-Ross, P. L., Barnes, S., Lee, M., Coward, L., Mandel, E., Koo, J., John, E. M., and Smith, M.	Assesing phytoestrogen exposure in epidemiologic studies: development of a database (United States).
33	Liggins, J., Bluck, L. J. C., Runswick, S., Atkinson, C., Coward, W. A., Bingham, S. A.	Daidzein and genistein content of fruits and nuts.
34	Thompson, L. U., Boucher, B. A., Liu, Z., Cotterchio, M., and Kreiger, N.	Phytoestrogen content of foods consumed in Canada, including isoflavones, lignans, and coumestan.

## Sheet: milk
Source: USDA National Nutrient Database for Standard Reference 28 Software v.2.3.4.2
Full Report (All Nutrients)
Report Run at: January 19	2016 15:27 EST
Nutrient data for: 01152, Milk, reduced fat, fluid, 2% milkfat, with added nonfat milk solids, without added vitamin A
Food Group: Dairy and Egg Products
Common Name:
Carbohydrate Factor: 3.87 Fat Factor: 8.79 Protein Factor: 4.27 Nitrogen to Protein Conversion Factor: 6.38
Nutrient	Unit	1Value per 100 g	mets	g/100g
Proximates
Water	g	87.71
Energy	kcal	56
Energy	kJ	232
Protein	g	3.95
Total lipid (fat)	g	1.98
Ash	g	0.87
Carbohydrate, by difference	g	5.49			*Exact carbohydrate composition not stated. Assumed to be lactose
Fiber, total dietary	g	0
Minerals
Calcium, Ca	mg	143
Iron, Fe	mg	0.06
Magnesium, Mg	mg	15
Phosphorus, P	mg	112
Potassium, K	mg	182
Sodium, Na	mg	59
Zinc, Zn	mg	0.41
Copper, Cu	mg	0.011
Manganese, Mn	mg	0.002
Selenium, Se	µg	2.6
Vitamins
Vitamin C, total ascorbic acid	mg	1.1
Thiamin	mg	0.045
Riboflavin	mg	0.194
Niacin	mg	0.101
Pantothenic acid	mg	0.339
Vitamin B-6	mg	0.046
Folate, total	µg	5
Folic acid	µg	0
Folate, food	µg	5
Folate, DFE	µg	5
Vitamin B-12	µg	0.39
Vitamin A, RAE	µg	17
Retinol	µg	16
Vitamin A, IU	IU	75
Lipids
Fatty acids, total saturated	g	1.232
04:00:00	g	0.013	but[u]	0.013
06:00:00	g	0.002	hxa[u]	0.002
08:00:00	g	0.003	octa[u]	0.003
10:00:00	g	0.005	dca[u]	0.005
12:00:00	g	0.003	ddca[u]	0.003
14:00:00	g	0.024	ttdca[u]	0.024
16:00:00	g	0.073	hdca[u]	0.073
18:00:00	g	0.026	ocdca[u]	0.026
Fatty acids, total monounsaturated	g	0.065
16:1 undifferentiated	g	0.009	hdcea[u]	0.009
18:1 undifferentiated	g	0.498	ocdcea[u]	0.498
Fatty acids, total polyunsaturated	g	0.009
18:2 undifferentiated	g	0.045
18:3 undifferentiated	g	0.003
20:4 undifferentiated	g	0
Cholesterol	mg	8
Amino Acids
Tryptophan	g	0.05	trp-L[u]	0.05
Threonine	g	0.161	thr-L[u]	0.161
Isoleucine	g	0.216	ile-L[u]	0.216
Leucine	g	0.35	leu-L[u]	0.35
Lysine	g	0.283	lys-L[u]	0.283
Methionine	g	0.09	met-L[u]	0.09
Cystine	g	0.033	cys-L[u]	0.033
Phenylalanine	g	0.172	phe-L[u]	0.172
Tyrosine	g	0.172	tyr-L[u]	0.172
Valine	g	0.239	val-L[u]	0.239
Arginine	g	0.129	arg-L[u]	0.129
Histidine	g	0.097	his-L[u]	0.097
Alanine	g	0.123	ala-L[u]	0.123
Aspartic acid	g	0.271	asp-L[u]	0.271
Glutamic acid	g	0.748	glu-L[u]	0.748
Glycine	g	0.076	gly[u]	0.076
Proline	g	0.346	pro-L[u]	0.346
Serine	g	0.194	ser-L[u]	0.194
Other

## Sheet: oil
Source: USDA National Nutrient Database for Standard Reference 28 Software v.2.3.4.2
Full Report (All Nutrients)
Report Run at: January 19	2016 15:26 EST
Nutrient data for: 04582, Oil, canola
Food Group: Fats and Oils
Common Name:low erucic acid rapeseed oil
Fat Factor: 8.84
Nutrient	Unit	1Value per 100 g	mets	g/100g
Proximates
Water	g	0
Energy	kcal	884
Energy	kJ	3699
Protein	g	0
Total lipid (fat)	g	100
Ash	g	0
Carbohydrate, by difference	g	0
Fiber, total dietary	g	0
Sugars, total	g	0
Minerals
Calcium, Ca	mg	0
Iron, Fe	mg	0
Magnesium, Mg	mg	0
Phosphorus, P	mg	0
Potassium, K	mg	0
Sodium, Na	mg	0
Zinc, Zn	mg	0
Copper, Cu	mg	0
Manganese, Mn	mg	0
Selenium, Se	µg	0
Vitamins
Vitamin C, total ascorbic acid	mg	0
Thiamin	mg	0
Riboflavin	mg	0
Niacin	mg	0
Pantothenic acid	mg	0
Vitamin B-6	mg	0
Folate, total	µg	0
Folic acid	µg	0
Folate, food	µg	0
Folate, DFE	µg	0
Choline, total	mg	0.2
Betaine	mg	0
Vitamin B-12	µg	0
Vitamin B-12, added	µg	0
Vitamin A, RAE	µg	0
Retinol	µg	0
Carotene, beta	µg	0
Carotene, alpha	µg	0
Cryptoxanthin, beta	µg	0
Vitamin A, IU	IU	0
Lycopene	µg	0
Lutein + zeaxanthin	µg	0
Vitamin E (alpha-tocopherol)	mg	17.46
Vitamin E, added	mg	0
Tocopherol, beta	mg	0.01
Tocopherol, gamma	mg	27.34
Tocopherol, delta	mg	0.99
Vitamin D (D2 + D3)	µg	0
Vitamin D	IU	0
Vitamin K (phylloquinone)	µg	71.3
Lipids
Fatty acids, total saturated	g	7.365
04:00:00	g	0	but[u]	0
06:00:00	g	0	hxa[u]	0
08:00:00	g	0	octa[u]	0
10:00:00	g	0	dca[u]	0
12:00:00	g	0	ddca[u]	0
14:00:00	g	0	ttdca[u]	0
15:00:00	g	0
16:00:00	g	4.298	hdca[u]	4.298
17:00:00	g	0
18:00:00	g	2.087	ocdca[u]	2.087
20:00:00	g	0.65
22:00:00	g	0.33
Fatty acids, total monounsaturated	g	63.276
14:01:00	g	0
15:01:00	g	0
16:1 undifferentiated	g	0.214	hdcea[u]	0.214
17:01:00	g	0
18:1 undifferentiated	g	61.744	ocdcea[u]	61.744
18:1 c	g	61.714
18:1 t	g	0.03
20:01:00	g	1.317
22:1 undifferentiated	g	0
Fatty acids, total polyunsaturated	g	28.142
18:2 undifferentiated	g	19.005
18:2 n-6 c,c	g	18.64
18:2 t,t	g	0.365
18:3 undifferentiated	g	9.137
18:3 n-3 c,c,c (ALA)	g	9.137
18:3 n-6 c,c,c	g	0
18:04:00	g	0
20:2 n-6 c,c	g	0
20:3 undifferentiated	g	0
20:4 undifferentiated	g	0
20:5 n-3 (EPA)	g	0
22:5 n-3 (DPA)	g	0
22:6 n-3 (DHA)	g	0
Fatty acids, total trans	g	0.395
Fatty acids, total trans-monoenoic	g	0.03
Cholesterol	mg	0
Stigmasterol	mg	3
Campesterol	mg	241
Beta-sitosterol	mg	413
Amino Acids
Other
Alcohol, ethyl	g	0
Caffeine	mg	0
Theobromine	mg	0
Sources of Data
1	Nutrient Data Laboratory, ARS, USDA	Determination of the Tocopherol Content of Selected Foods
2	Nutrient Data Laboratory, ARS, USDA	NDL Report Vitamin E 1997
3	Nutrient Data Laboratory, ARS, USDA	National Food and Nutrient Analysis Program Wave 9a
Footnotes
(a)"Other phytosterols and phytostanols identified include: beta-sitostanol (0.925 mg)	campestanol (0.811 mg) and delta-5 avenasterol (11.721 mg)"

## Sheet: flour
Source: USDA National Nutrient Database for Standard Reference 28 Software v.2.3.4.2
Full Report (All Nutrients)
Report Run at: January 19	2016 15:08 EST
Nutrient data for: 20080, Wheat flour, whole-grain
Food Group: Cereal Grains and Pasta
Common Name:
Carbohydrate Factor: 3.78 Fat Factor: 8.37 Protein Factor: 3.59 Nitrogen to Protein Conversion Factor: 5.83
Nutrient	Unit	1Value per 100 g	mets	g/100g
Proximates
Water	g	10.74
Energy	kcal	340
Energy	kJ	1424
Protein	g	13.21
Total lipid (fat)	g	2.5
Ash	g	1.58
Carbohydrate, by difference	g	71.97
Fiber, total dietary	g	10.7
Sugars, total	g	0.41
Sucrose	g	0.36	sucr[u]	0.36
Glucose (dextrose)	g	0	glc-D[u]	0
Fructose	g	0.05	fru[u]	0.05
Starch	g	57.77	lcts[u]	0
Minerals			malt[u]	0
Calcium, Ca	mg	34	gal[u]	0
Iron, Fe	mg	3.6
Magnesium, Mg	mg	137
Phosphorus, P	mg	357
Potassium, K	mg	363
Sodium, Na	mg	2
Zinc, Zn	mg	2.6
Copper, Cu	mg	0.41
Manganese, Mn	mg	4.067
Selenium, Se	µg	61.8
Vitamins
Vitamin C, total ascorbic acid	mg	0
Thiamin	mg	0.502
Riboflavin	mg	0.165
Niacin	mg	4.957
Pantothenic acid	mg	0.603
Vitamin B-6	mg	0.407
Folate, total	µg	44
Folic acid	µg	0
Folate, food	µg	44
Folate, DFE	µg	44
Choline, total	mg	31.2
Betaine	mg	72.8
Vitamin B-12	µg	0
Vitamin B-12, added	µg	0
Vitamin A, RAE	µg	0
Retinol	µg	0
Carotene, beta	µg	5
Carotene, alpha	µg	0
Cryptoxanthin, beta	µg	0
Vitamin A, IU	IU	9
Lycopene	µg	0
Lutein + zeaxanthin	µg	220
Vitamin E (alpha-tocopherol)	mg	0.71
Vitamin E, added	mg	0
Tocopherol, beta	mg	0.23
Tocopherol, gamma	mg	1.91
Tocopherol, delta	mg	0
Vitamin D (D2 + D3)	µg	0
Vitamin D	IU	0
Vitamin K (phylloquinone)	µg	1.9
Lipids
Fatty acids, total saturated	g	0.43
04:00:00	g	0	but[u]	0
06:00:00	g	0	hxa[u]	0
08:00:00	g	0	octa[u]	0
10:00:00	g	0	dca[u]	0
12:00:00	g	0	ddca[u]	0
14:00:00	g	0	ttdca[u]	0
15:00:00	g	0
16:00:00	g	0.41	hdca[u]	0.41
17:00:00	g	0
18:00:00	g	0.02	ocdca[u]	0.02
20:00:00	g	0
22:00:00	g	0
1 day, 0:00:00	g	0
Fatty acids, total monounsaturated	g	0.283
14:01:00	g	0
15:01:00	g	0
16:1 undifferentiated	g	0	hdcea[u]	0
17:01:00	g	0
18:1 undifferentiated	g	0.273	ocdcea[u]	0.273
20:01:00	g	0.01
22:1 undifferentiated	g	0
24:1 c	g	0
Fatty acids, total polyunsaturated	g	1.167
18:2 undifferentiated	g	1.093
18:3 undifferentiated	g	0.073
18:04:00	g	0
20:2 n-6 c,c	g	0
20:3 undifferentiated	g	0
20:4 undifferentiated	g	0
20:5 n-3 (EPA)	g	0
21:05:00	g	0
22:04:00	g	0
22:5 n-3 (DPA)	g	0
22:6 n-3 (DHA)	g	0
Cholesterol	mg	0
Amino Acids
Tryptophan	g	0.174	trp-L[u]	0.174
Threonine	g	0.367	thr-L[u]	0.367
Isoleucine	g	0.443	ile-L[u]	0.443
Leucine	g	0.898	leu-L[u]	0.898
Lysine	g	0.359	lys-L[u]	0.359
Methionine	g	0.228	met-L[u]	0.228
Cystine	g	0.275	cys-L[u]	0.275
Phenylalanine	g	0.682	phe-L[u]	0.682
Tyrosine	g	0.275	tyr-L[u]	0.275
Valine	g	0.564	val-L[u]	0.564
Arginine	g	0.648	arg-L[u]	0.648
Histidine	g	0.357	his-L[u]	0.357
Alanine	g	0.489	ala-L[u]	0.489
Aspartic acid	g	0.722	asp-L[u]	0.722
Glutamic acid	g	4.328	glu-L[u]	4.328
Glycine	g	0.569	gly[u]	0.569
Proline	g	2.075	pro-L[u]	2.075
Serine	g	0.62	ser-L[u]	0.62
Other
Alcohol, ethyl	g	0
Caffeine	mg	0
Theobromine	mg	0
Flavonoids
Isoflavones
Daidzein	mg	0
Genistein	mg	0.01
Total isoflavones	mg	0.02
Proanthocyanidin
Proanthocyanidin dimers	mg	0
Proanthocyanidin trimers	mg	0
Proanthocyanidin 4-6mers	mg	0
Proanthocyanidin 7-10mers	mg	0
Proanthocyanidin polymers (>10mers)	mg	0
Sources of Data
1	Nutrient Data Laboratory, ARS, USDA	National Food and Nutrient Analysis Program, Wave 9m
2	Nutrient Data Laboratory, ARS, USDA	Variability of the sugar content of foods
3	Nutrient Data Laboratory, ARS, USDA	National Food and Nutrient Analysis Program Wave 13x
4	V.C. Morris, O.A. Levander	Selenium content of food
5	A.L. Moxon, D.L. Palmquist	Selenium content of foods grown or sold in Ohio
6	O.E. Olson, I.S. Palmer	Selenium in foods purchased or produced in South Dakota
7	I.M. Heinonen, V. Ollilainen, E. Linkola, P. Varo, P. Koivistoinen	Carotenoids and Retinoids in Finnish Foods: Cereal and Bakery Products
8	Nutrient Data Laboratory, ARS, USDA	Choline Study, Local pickup VPI, NFNAP
9	G. Ferland, D. MacDonald, J.A. Sadowski	Development of a diet low in vitamin K (phylloquinone)
10	T.J. Koivu, V. I. Piironen, P.H. Mattila	Phylloquinone (Vitamin K) in Cereal Products
11	de Pascual-Teresa, S., Santos-Buelga, C., and Rivas-Gonzalo, J.C.	Quantitative analysis of flavan-3-ols in Spanish foodstuffs and beverages
12	Hellström, Törrönen, A.R., and Matilla, P.H.	Proanthocyanidins in common food products of plant origin
13	Liggins, J., Mulligan, A., Runswick, S., and Bingham, S. A.	Daidzein and genistein content of cereals.

[truncated: 2 more sheets: corn_syrup, Chow,HighFatDiet]
